# Supplementary material
Source: HighWire-hosted journal article supplement (https://bmjopen.bmj.com/content/11/5/e044090)
Supplement: inline-supplementary-material-5 [file inline-supplementary-material-5.pdf]

**Additional file 5** Geographic variation of the health care services grouped by strength and direction of recommendations, and service category

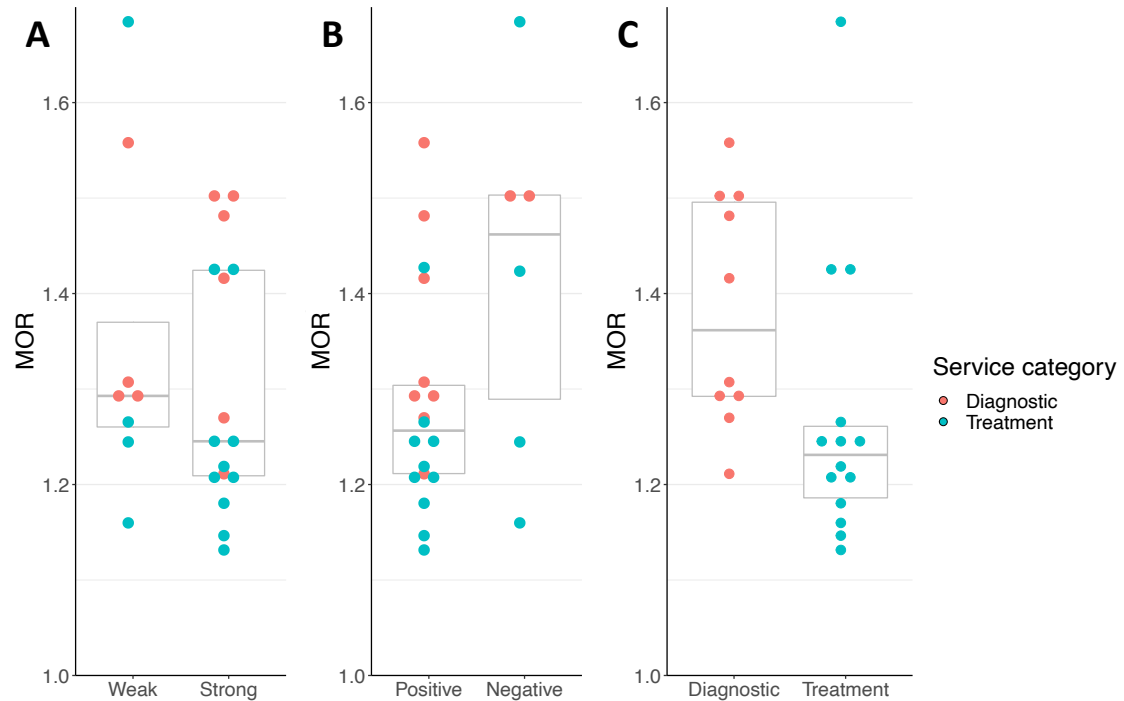

A Weak and strong recommendations; B Positive and negative recommendations; C Diagnostic and treatment services. MOR – median odds ratio. Boxplots depict the interquartile range of values (upper and lower hinges), and the median value.

Based on Welch's t-test, the difference in mean variances [95CI%] of diagnostic and treatment services was 0.04 [-0.01, 0.11], and the difference in mean MOR was 0.11 [-0.01, 0.23].
